# Supplementary material for: Genetic convergence of industrial melanism in three geometrid moths
Source: Biol Lett. 2019 Oct 16;15(10):20190582. doi: 10.1098/rsbl.2019.0582 (PMC6832188; doi:10.1098/rsbl.2019.0582)
Supplement: Primers and amplicon sequences [file rsbl20190582supp1.xlsx]

## Sheet: title
Genetic convergence of industrial melanism in three geometrid moths
Arjen E van’t Hof, Louise A Reynolds, Carl J Yung, Laurence M Cook, Ilik J Saccheri

## Sheet: primers and amplicons
Species	locus	gene full name	genbank	application	forward primer ID	forward primer sequence	reverse primer ID	reverse primer sequence	sequencing primer/restriction enzyme	sequencing primer sequence	Amplicon RefSeq
Biston betularia	locus a/Trehalase 1B	Trehalase 1B	HM449931	genotype-phenotype association	Bb_Trhls_57U	TGAAGTGGTCGGCAATCTGA	Bb_Trhls_304L	GTGGCGCAGCTCGGATAGAA	Bb_Trhls_57U	TGAAGTGGTCGGCAATCTGA	TGAAGTGGTCGGCAATCTGACAGACGTGCACGCTACGCGCATCCTGCCCGTGGACCTTAATGCTATTTTTGCCGGTGCACTTGAACTAGCTGGTGACTTTCGCAACCGTCTCAAAGACAGACGTGAAGCACAGAAATGGTGGAGTCTTGCCAACTATTGGCGGAGCGCCATTGAAAATGTAATGTGGGATCCCGTGGATGGCGTGTGGTATGATTACGATGCCGAAGCGAGAGCTCCTAGAAAACACTTCTATCCGAGCTGCGCCAC
Biston betularia	locus b/isoQC	glutaminyl-peptide cyclotransferase	HN150707	genotype-phenotype association	CRB_31U	GAATTCACGAATTTCACGTCAGCATCTG	CRB_1502L	TCAGTATATCTATTTCATCGCTGCC	CRB88U	GTTGCCACAAAGCTTAGCACAACATAAG	GAATTCACGAATTTCACGTCAGCATCTGAATAGGTATCTATTATTATCATTGCAGTTGCCACAAAGCTTAGCACAACATAAGTGTAGGTGATCAAGTGACAAAAAATTTGTGAAAGTCGTAAGTTGTTCAAATGTCCCTATTTGGCTCCTTTAAAACTCTACTCTATAGCGAGAAGGTCCATAATTAACATGCAACGAAACAAAATTAGTTAACTTACCTTTTCCTGATAAAACTTTAATATTTTGTTACTTTTTTTACCACCAATTTTAGTGTTAACGAGTACAACACACAAGCTAGCTATTACTAAATAAACTATTATTTTATTCATCTTGACACTTAGTTTATAAATAATGTGTTTTATAGCACCAATTTATTACACATTCACGTTATTTAGGCCA…
Biston betularia	locus c/cortex intron 1	cortex	HN150710	genotype-phenotype association	41m18ds_39U	ATCAAACACCTAGCCAACCCTAA	41m18ds_652L	GAATGCGGCGTCTATTGGGTTAT	41m18ds_39U	ATCAAACACCTAGCCAACCCTAA	ATCAAACACCTAGCCAACCCTAAAAAAGTCTATCAATATTTTTTTCCTAAATAAAACATAAAACTAAGACGCTCGCCAATTTACAGGGACGTAAAAACAAGAGCTTTGCGGTTAGCAAAGCTAACACGGATTCCAAAGACGTGTCATGTCATAGAACATGGTTGGAATATTTCACGGCAGGCTGTAACCATCCTGCACTATCTTCTCCTTGTACGGCTCTTTCAGAATGGTCACAGTAAAATGTCACTCCGTAACAGTAAGGTAAGGTAGGTCATTCTTGATGTTCTATGGCATTAGAATATTAATTTGAGAGAGTAAAATACTGACTCTCTTTAGAAGAAAAGTAATAATTTAAAAACTGTAACACTGTACCAAATTTCAAACAAGATTTATAAAAAA…
Biston betularia	cortex exon1 region	cortex	KT182637.1	genotype-phenotype association	CDgap_31.4_U	AGCCCACTCTTTGTCAAGTACAGTC	CDgap_31.4_L	GGCGACAGTTACAGCACTAGGTG	CDgap_31.4_U	AGCCCACTCTTTGTCAAGTACAGTC	AGCCCACTCTTTGTCAAGTACAGTCCGTGTCAGTCAAATCCAGTCATGCTTTAGTAAAGTAGTGGCGACTTTACTATAAAAAGCTTCGATGGAGTTTTGGAAGCAACACGAAAAGTCATGTTTCACAACATTATATCATTTTCGCGCTTGTAATTTGGCACTTTATGAATAAAAAACAACAATTTTTATGCATAAACACCTGACAAAACACTAGTTTTGGAAAAAAATACAACGGGGCGACACGACTCTTTCCGCGTTCCCGCCAAACTCATTTAGGTACTTGTGGCTAGTGGATCTTACCTTTTTTTAATCGTGTTGAGAGAATGAGCCAAAATCAAACCCAGAGCTATCGTCGGCTTTCATCAAAGCGCAGAACTCAAGAGTTTATAATCCGCTTAA…
Biston betularia	locus d/HEATR2	HEAT repeat containing 2	HN150703	genotype-phenotype association	13J1ups_103U	GCCAATTGATGTTGACATGC	13J1ups_571L	AGTCCGGGTGGTAGCGTTGC	13J1ups_103U	GCCAATTGATGTTGACATGC	GCCAATTGATGTTGACATGCAAAGGTTGTGTTATGGGCTCAAGCAAGGCCAGCCTCGAAATATGTTTTTAAAAGGAAACAGCATAGTAGCAATGCTCCAATATTTTTAACCATTACTGCATCAGCTGACGGTCTTTCCACCGCTACCCACGCAGCTGATTGTTGTTTTCATACTTTAAATTATGTAAACAATTATTTTTATTTATTTATTTATTTTACGCGTTTTTTTACAAGTTCATGCGAGCAGCTGACGCGTAATCCCCCCTCCATGCAGTTGACGATTATTTTTTAGCTCAATATGATGTCAACTATTTATGAAAAGAGTTTCAGCCGGCGTACTATTACTTAATTTTTTTTACAACTTCCACAACCTCTCAAACCCACACCCAGTGCGGGCCAG…
Biston betularia	locus e/lethal (2)	lethal (2)	HN150704	genotype-phenotype association	24J15ups_186U	TTACAAAGCGAAAGTGTTAGGAC	24J15ups_604L	ACCTTTAGTACGCCTTAGTGCAT	24J15ups_604L	ACCTTTAGTACGCCTTAGTGCAT	ACCTTTAGTACGCCTTAGTGCATGATGGCTATGATATTTATTTTGCCTAACGTTTGAGTATTTTGTTTTGTTTTGTAAGGAAGAGGTCGGCTCCGGGAAACAAAATTCCTTGTCCGGAGTCTGACAGATTGCATGTATAATTTATGTAATTTCATTGTTATTTTCACAAAAATTAATTGAATTGAATTGCCCTACGACACGGCAATGAGGCCAGTGTTTTGGGGAATATTCCCATTTATAGCATCTTTTTAGATTAGTTCATTTTATTTGTTCCTCTGTAGTATGTAGACTGTACGATTTTTGTTATTTTTTTGTTTTTTAAATTTGTTTTTTAAATACATAGTGGGTATCACAGTGAAACCTGGTTAAGTGGGCCCTGGATATGTGAGAAAACTCTGC…
Phigalia pilosaria	locus a/Trehalase 1A	Trehalase 1A	MN228572	genotype-phenotype association	Pp_Trhls1A_382U	ATCTGGCCGACTCTAGGCAGAAA	Pp_Trhls1A_909L	CCGCGCTTTTAATGTCGACGTAG	Pp_Trhls1A_909L	CCGCGCTTTTAATGTCGACGTAG	CCGCGCTTTTAATGTCGACGTAGAATTCAGTGTGGTCTTCGTGAGAGTCTGTCTTTTGAGCCGTGTCATAATCTTCGAAGTAGGACTCTGGTCGGGGTCCTGTACTCGGCGCGTAGTACCTGAGTAGAGTATAAACCCTGTCGTTTTTACTAAACGACACAATTTGTGTGTCCATCCAGTAGTGTAATTCCTTTTCGAGAGATCCAATATGTTTTTTCAGGAATGCTTTGTCCTTTGTCTTCTCATAATAGCGCATCACCATGGCCGATAGAAGGGGAGGCTGGCTGCGCTCCTGGTAATACCATCTGCTGCCGTTGGGRATATGCCCGAGCTTATTGAGCAGTTCGATCAGATTCTCGATCATGCCTTTGGCAGTCTCTTCCATTCCGCTAATAAGTA…
Phigalia pilosaria	locus b/isoQC	glutaminyl-peptide cyclotransferase	MN228567	genotype-phenotype association	Pp_isoQC_26U	CTTGCTCAACTACTCTTCCTTAC	Pp_isoQC_878L	TCTGCTCAGGAACGGTATGTGGT	Pp_isoQC_26U	CTTGCTCAACTACTCTTCCTTAC	CTTGCTCAACTACTCTTCCTTACGGACATAATAAGTATATGTATTATGTATATACTTATTATTATTTATGTATTCTAACGCGATCCCTATTAATTAGTATTCGGCTATTTAATTTATATTTAATGTATCACAGGGGTAAAGCGGAGCAGACCTACTTCAGACTGCGGAGTTCGGGCTCCTACGTGGAAGATGACCACATACCGTTCCTGAGCAGA
Phigalia pilosaria	locus c/cortex intron 1	cortex	N/A (see Amplicon RefSeq)	genotype-phenotype association	Pp_locusC_F	TGCCTGCACAGTCATATATCCAAA	Pp_locusC_R	CAGAATACCCGCCATCTTCACTA	Pp_locusC_F	TGCCTGCACAGTCATATATCCAAA	TGCCTGCACAGTCATATATCCAAACCAGTGGAATCATCTTTTACGTGTATTCTATCAGTAAACTATCCYGACTAGAGGTTGTTTCTATTTCTTACCTGCCAGCATGCTGTCCATTAGCCTCCTTGAGAGATATTCCTAACCACACATAAACCAACAGGATCCCTAACATTCTCCAACTTCTCAGATCATAAAGTTCCTTCTTACTGTGCATAAACCACCTCCAGTGAAGTTTTTTCTATTTAAATAGTTTTAATAGTTTCTAGATAAGTATAGGCTAGTTAGGATTTMATTATCGTTTTTATAGAGCTTAATKTTTTTCTAGGTTTGTAGGTTTTAACGATAAATATTTAGCAAATTTTGTTACATTTGGCATTTAAGTAAAATTAAGTTAAACTTRAG…
Phigalia pilosaria	cortex exon1 region	cortex	N/A (see Amplicon RefSeq)	genotype-phenotype association	Pp_cortE1regionF	CGGACACTGTAAAATTCGTCACCT	Pp_cortE1regionR	GCCGACAAAATGCTAAGATTGGA	Pp_cortE1regionR	GCCGACAAAATGCTAAGATTGGA	CGGACACTGTAAAATTCGTCACCTTCTATTACAAAAGCCACGAGTCTGTCTACCGAGATGTCTTTGACATCAATCTCAGTTTGATAGCCGAAAGCGCTCGTGCGTGGCAAGACGCCATGATTCTTTTTTGCCGTATTTTATCGGAGTTTTTGTTCAGTACGTCTCATTTGATTCTGTGAATTGCGGCCATAGATTCGTTATTTGATAAGTAATAAAGTTTTAGATGTCGCGTGCGCCGCGTGTTCGTCTCTTTTGTGAGCGAGAATGGATTTTCAACTACAAAATTGGACGTGATTTTTCGTTTTGTATGGTTAAGTAACTTTTTATTTATTGGACTAGAGAAGCGATGATTCAACAAGTCGGCAATTCTAAGTATGATTGTATGTTTCAATTTATATT…
Phigalia pilosaria	locus d/HEATR2	HEAT repeat containing 2	MN228568	genotype-phenotype association	Pp_HEATR2_110U	CGTCGGTAACTGGATGCTCAACT	Pp_HEATR2_1847L	GTCTTCCTCGTTCTCCTCCATGT	Pp_HEATR2_1847L	GTCTTCCTCGTTCTCCTCCATGT	GTCTTCCTCGTTCTCCTCCATGTATTGAAGACCAATGTCCGTCCAAAACTTGTCTGCTGTCTCGCGAATTTCGACCATGACATCACTTAGACTGGAAAAATGTACCATTACAGTAAAGTTTTCACCATAGCACAGAACATATCTGTACCTSAGAGGTATACAATATTAACAGCCAAAACAAAAAATTACAAATCAAATCAAAAATGCGCGGCACACCCATAGTTATTAGTGGATTTAATGTGATTATATTACACCATCGAGTATTTCTTTTCATTGGCGCCGTAGGACTTAATGTTTTGTTTATTATTATGTGGAACTGGTTCTTGCGATTTTAATGGTGCAAAAAACGTTATTTCGAAAAAAGTGGAGTTACTACTGTATACCTCTGACGTACAGATA…
Phigalia pilosaria	locus e/lethal (2)	lethal (2)	MN228569	genotype-phenotype association	Pp_Lethal2_41U	GGACGCCGAAGGATTCTTTGATT	Pp_Lethal2_114L	ATCAGCTCCACCATGTCGCTTTG	Pp_Lethal2_114L	ATCAGCTCCACCATGTCGCTTTG	ATCAGCTCCACCATGTCGCTTTGCGCCTGGTACTGCATCGTCACCATGCCTATGAACACCTGGAGACATTCCCTTCAAACTCTATCGAATATTCATCATACAACATATTCCTGTTACGATGAAACTAGAATTATCGGCAAAAAATATTAAATTGTTAAGAAAAAGTGTTTCACATCGATGAAGTTTCACTGTTAGGTCTGGCCGCGATCGATTAGAGATACTGAATCGATTGTGTTAAAACATTTATGATAATTGCCTTGAAGATGGAATAAATAACTAGATCACAAAMGTTTCAAATGGTGATCGAAAMAATCACAAATTGGTTTGAGAAATTTCCAACACAAATATTTGTCTTATTGCCGTTAGGTGTAATGACACATAAAGTCAAAACAAAGGTAC…
Odontopera bidentata	locus a/Trehalase 1A	Trehalase 1A	MN244707	genotype-phenotype association	Ob_Trhls1A_26U	GGGACAGCTAAGGGCATGATCGAGA	Ob_trhls-1A_603L	GGTAGCTCTCCATTGTTTCGCTAGGT	Ob_Trhls1A_26U	GGGACAGCTAAGGGCATGATCGAGA	GGGACAGCTAAGGGCATGATCGAGAATCTAATAGAACTACTCAACAAGCTCGGACATATTCCCAACGGTAGTCGATGGTATTATCAGGAGCGCAGTCAACCRCCTCTCCTCTCCGCCATGATGATGCGCTATTATGAGAAGACAAAAGACAAGGCATTCTTGAAAGAGCATATCAGCTCCCTCGTTAAGGAAATGAATTATTGGATGGACACGCAAATTGTGACKTTCAATAAAGATGACAGGGTGTTCACTCTGCTCAGATACTACRCTCCTAGCTCGGGACCTCGGCCGGAGTCCTACTTCGAAGATTACAACACAGCACAAAACCTCGACCCCCATCAAGATCACACCGAATTCTATATCGATATGAAAAGTGCAGCTGAGAGTGGATGGGATTTC…
Odontopera bidentata	locus b/isoQC	glutaminyl-peptide cyclotransferase	MN244702	genotype-phenotype association	Ob_isoQC_247U	GTTGGCGATTACATTGTGAAGGAG	Ob_isoQC_480L	TCGACATCACTTTAGCCAGGTTG	Ob_isoQC_247U	GTTGGCGATTACATTGTGAAGGAG	GTTGGCGATTACATTGTGAAGGAGTTCAAAGATTTGGGATGGGATGTAACGGAGAATGAGTTTACAGATCAGACCCCAGTGTTCGGACAGTTGAAGTTTAGAAACATTATCACAAAGTTGAATCCTAATGCAGACAGATTTCTGGTCCTGGCCTGCCATTATGACAGTAAATATACGAGAGAACATGTGTTTGTGGGTATGTACTATATAATTTGTATACTTATTCATTAAAATCCCAAAGTGCCAGTCAGCACCTAGTTCAGTACTGCTTCCACAGTGATCATTGTACCTACTTCTATTTTTTCTCAAGTGACACTTACATTTACGTTACATACATACAAATTGCTGGAAAGAATAAAAGAATATTTATTATAGTCAACTATTGTCGTAGGCGCGACG…
Odontopera bidentata	locus c/cortex intron 1	cortex	N/A (see Amplicon RefSeq)	genotype-phenotype association	Ob_locusC_F	CTCACRTAAGTCAACCTCCAGCTCT	Ob_locusC_R2	GGCYTACTTTAGCGCCCTYRCT	Ob_locusC_F2	CGACTTGCAYCCAACGCATCAAT	CTCACATAAGTCAACCTCCAGCTCTAAATCCTTATAAAAAGTTACACACCRAGATCATTACCGCAAAAAAYCGCACACTAAAYTCTYCTACAGTAACATGTTTAAATCAGTTTGCATTCGACTTGCATCCAACGCATCAATTCTATCAAAGAGAATTAATTAAAAAACGCCTTGACAGTAAGTAGATTTACACGTATTTTTAAAAGAATACACGTATATTTCAGCGAATCCAGCGTAAAAAGACATAGCTGGAGCATAGAYCAAKAGAACTGCATMGACGGYGCGCGACGCCTYTAAAACCTAGYRAGGGCGCTAAAGTARGCC
Odontopera bidentata	cortex exon1 region	cortex	N/A (see Amplicon RefSeq)	genotype-phenotype association	Ob_cortE1regF3	TTTTAACCTATGACTGACCTGTAATGA	Ob_cortE1regR4	ACCAGCTTTCGCGTTTTATARCAGA	Ob_cortE1regR4	ACCAGCTTTCGCGTTTTATARCAGA	ACCAGCTTTCGCGTTTTATAACAGAAGACAATAAAAATGTAGCCTTGAAGAATGAGATAGCTCTAGCCACAGGTCTTATAAAAAAATAACTCTTTTTATAAGGTCTGTGGCTCAAGCCCATTTTTTTTAAATTTATTTACTCTAAACTTAAGTTCGGTTAGTTTACAAATGAAAACGCACTAATTTTATTTGATAGACAACGTAATCATCAGAAGTTTGACAAAGACATAGATATAAATTTATTTATGTAATTAATCATTACAGGTCAGTCATAGGTTAAAA
Odontopera bidentata	locus d/HEATR2	HEAT repeat containing 2	MN244703	genotype-phenotype association	Ob_HEATR2_66U	GATACTCATTCTGGCATCGTATGATTC	Ob_locusD_F	ACACCCGAGGTTAGGTCTCTTGACATCAGG	Ob_locusD_F	ACACCCGAGGTTAGGTCTCTTGACATCAGG	ACACCCGAGGTTAGGTCTCTTGACATCAGGGTAGTGAGATGGCACATCTTTTAGGAAGTCGGTTTTCTTTTTGAGGTCTTCCTCATTCTCTTCCATGTATTGAAGACCAATGTCTATCCAGAACTTGTCGGCTGTGTCTCTGACATCTGCCATGACGTCACTCAGGCTGAAAATATACTAACTTTAATGTAAAGTTCACTAGCTGTGGTTTCACTATGCTTTTTTCCAAGATAAAAGGTAGCATATGTTACTTCGTGGCCCATAAAGCTATGTCAATCAATTGCTTTGTGATCCATGAAACAAGGGTAAAATAACAAATACTTAAGTACTTATATWTTTTTTTTANTGTWATTTGGTAACGTGACGAGCTGGTCGTTTGCCTRATGGTAAGCCTAACGC…
Odontopera bidentata	locus e/lethal (2)	lethal (2)	MN244704	genotype-phenotype association	Ob_Lethal2_1392U	TGCCGAGGGATTCTTTGACTTGC	Ob_Lethal2_1558L	GACTCCAGCCCCATTTTCTCACT	Ob_Lethal2_1558L	GACTCCAGCCCCATTTTCTCACT	TGCCGAGGGATTCTTTGACTTGCAGTGTAACCAGGTATACGCTAACAATCTGTATGAGACTTGGTTTTTAGGTGCGTCGTAAGTGGCGATGAACTACGGGCGGCAGGTCTTTTTTTTTTTWAACTATTAATCTGTGCTAAGCAGTGGCAGGTTTTTTTTATTCACGATAGGTTAATTTTGGTGGGACTGCCATGTTTATGGGCAGGCTTGATGATTAACAACAGGCGAACGACTGTCAAAATTGCTACATTCATGTTGGTCGATAAAGTCTATTCTACTATTTTTGGTCTAGCCATATCAAGAATTCTCTATTTCCGTCCGCAATACTTTGACATGACTCGCCAATTTTAAATGCGCCTCTAAGTACTAGAAAACGTTTTTCAAGAACACAGGCGCCTG…
Biston betularia	rab-ggt ß	Rab geranylgeranyltransferase, beta subunit	HM449903	Linkage mapping	RABGGTB-F1	AGGAGACAAATGGGGTGAAATAGACACTAGGTTyTCnTTyTGyGC	RABGGTB-R1	ACCAGCATGGCTTTCCGATCCAGGTTTGGAACCrAAnCCnCCrTC	RABGGTB_F1	AGGAGACAAATGGGGTGAAATAGACACTAGGTTyTCnTTyTGyGC	N/A
Biston betularia	Trehalase 1B	Trehalase 1B	HM449931	Linkage mapping	Trhls_F2	AGTGCAGCAGAAAGTGGATGGGAyTTyTCGACnCGnTGGTT	Trhls_38L	ACCCGAAGCCATCCTGCACACCATA	Trhls_F2	AGTGCAGCAGAAAGTGGATGGGAyTTyTCGACnCGnTGGTT	N/A
Biston betularia	CRB88U/isoQC/locusB	glutaminyl-peptide cyclotransferase	HN150707	Linkage mapping	CRB_31U	GAATTCACGAATTTCACGTCAGCATCTG	CRB_1502L	TCAGTATATCTATTTCATCGCTGCC	CRB88U	GTTGCCACAAAGCTTAGCACAACATAAG	N/A
Biston betularia	locus c/cortex intron 1	cortex	HN150710	Linkage mapping	41m18dstr_39U	ATCAAACACCTAGCCAACCCTAA	41m18dstr_652L	GAATGCGGCGTCTATTGGGTTAT	41m18dstr_39U	ATCAAACACCTAGCCAACCCTAA	N/A
Biston betularia	locus d/HEATR2	HEAT repeat containing 2	HN150703	Linkage mapping	BAC13J01upstr_103U	GCCAATTGATGTTGACATGC	BAC13J01upstr_571L	AGTCCGGGTGGTAGCGTTGC	BAC13J01upstr_103U	GCCAATTGATGTTGACATGC	N/A
Biston betularia	locus e/lethal (2)	lethal (2)	HN150704	Linkage mapping	24J15ups_186U	TTACAAAGCGAAAGTGTTAGGAC	24J15ups_604L	ACCTTTAGTACGCCTTAGTGCAT	EcoRI	N/A	N/A
Biston betularia	shuttle craft	shuttle craft	MN244705	linkage mapping	Bb_shuttle_1U	CACAATGTCTCAGTGGAACAATTCA	Bb_shuttle_761L	GATGGTTAGGCTCTTGACTCTGCT	Bb_shuttle_341L	TGGAGGATTGTATTGGGTTGGTG	N/A
Biston betularia	nudC	nudC	HM449894	Linkage mapping	Bb_NudC_577U	TGTATAGCTCGTCGTAATGG	Bb_NudC_776L	ATGGTCTTCTGGCAGTTCAT	NudC_577U	TGTATAGCTCGTCGTAATGG	N/A
Phigalia pilosaria	rab-ggt ß	Rab geranylgeranyltransferase, beta subunit	MN228570	Linkage mapping	PBB_RABGGTB_F2	ATACTTTATACACTAAGCGCTGTTC	PBB_RABGGTB_R2	AAGCTGCCGTCGTCTTGCTG	PBB_RABGGTB_R2	AAGCTGCCGTCGTCTTGCTG	N/A
Phigalia pilosaria	cortex	cortex	MN228566	Linkage mapping	Pp_cortE1regionF	CGGACACTGTAAAATTCGTCACCT	Pp_cortE1regionR	GCCGACAAAATGCTAAGATTGGA	Pp_cortE1regionR	GCCGACAAAATGCTAAGATTGGA	N/A
Phigalia pilosaria	HEATR2	HEAT repeat containing 2	MN228568	Linkage mapping	Pp_HEATR2_110U	CGTCGGTAACTGGATGCTCAACT	Pp_HEATR2_1847L	GTCTTCCTCGTTCTCCTCCATGT	Pp_HEATR2_1847L	GTCTTCCTCGTTCTCCTCCATGT	N/A
Phigalia pilosaria	lethal (2)	lethal (2)	MN228569	Linkage mapping	Pp_Lethal2_41U	GGACGCCGAAGGATTCTTTGATT	Pp_Lethal2_114L	ATCAGCTCCACCATGTCGCTTTG	HpyCH4IV	N/A	N/A
Phigalia pilosaria	shuttle craft	shuttle craft	MN228571	Linkage mapping	PBBshuttlecraft_F	GGAACATCTGCGCCAAGCC	PBBshuttlecraft_R	GAGGTCGCCGCAGGGTATCTC	PBBshuttlecraft_F	GGAACATCTGCGCCAAGCC	N/A
Odontopera bidentata	rab-ggt ß	Rab geranylgeranyltransferase, beta subunit	MN228573	Linkage mapping	Ob_RABGGTB_35U	AGGATAGGCCAAAAACACTTCTACTG	Ob_RABGGTB_226L	CTCTCGTTGTCCTGGCATGTAGC	Ob_RABGGTB_35U	AGGATAGGCCAAAAACACTTCTACTG	N/A
Odontopera bidentata	Trehalase 1A	Trehalase 1A	MN244707	Linkage mapping	Ob_Trhls1A_26U	GGGACAGCTAAGGGCATGATCGAGA	Ob_trhls-1A_603L	GGTAGCTCTCCATTGTTTCGCTAGGT	Ob_Trhls1A_65U	CTCAACAAGCTCGGACATATTCCCA	N/A
Odontopera bidentata	unkempt	unkempt	MN228574	Linkage mapping	Ob_unkempt_152U	CCTGCCCCCAGTATCACAATAG	Ob_unkempt_202L	GGCGTGCTGCGGTACTTGTA	Ob_unkempt_202L	GGCGTGCTGCGGTACTTGTA	N/A
Odontopera bidentata	cortex	cortex	MN244706	Linkage mapping	Ob_Fizzy_8U	CGACACTTCTTGGACCGCGTGAA	Ob_Fizzy_520L	AACTCTTCTGCGAGCGTCCGTCT	Ob_Fizzy_520L	AACTCTTCTGCGAGCGTCCGTCT	N/A
Odontopera bidentata	p26S-su4	proteasome 26S non ATPase subunit 4	MN228575	Linkage mapping	Ob_26s-SU4_87U	GGGCAAATCCTGAGAATAACGTC	Ob_26s-SU4_533L	AGCGCCATCACCACCAATTAG	Ob_26s-SU4_87U	GGGCAAATCCTGAGAATAACGTC	N/A
Odontopera bidentata	shuttle craft	shuttle craft	MN228576	Linkage mapping	Ob_shuttle_1737U	CCATGTACTGCATCTGCGGTGT	Ob_shuttle_1819L	GTTGGGATGGTATCGTTCGTGTT	Ob_shuttle_1819L	GTTGGGATGGTATCGTTCGTGTT	N/A
Odontopera bidentata	nudC	nudC	MN228577	Linkage mapping	Ob_nudC_494U	ATGAGCCACCCGCGTTACCTGTT	Ob_nudC_612L	GCyCTTTGGACGACTTGATGTCA	gel indel	N/A	N/A
Phigalia pilosaria	cortex	cortex	MN228566	5'RACE Gene Specific Primer 1 and 2	N/A	N/A	Pp_cort_296L	TCTGGAAAAGGGGCAGCACTATAAG	N/A	N/A	N/A
Odontopera bidentata	cortex	cortex	MN244706	5'RACE Gene Specific Primer 1	N/A	N/A	Ob_cort_337L	GCGACGAGAACATTGTCATTGCT	N/A	N/A	N/A
Odontopera bidentata	cortex	cortex	MN244706	5'RACE Gene Specific Primer 2	N/A	N/A	Ob_cort_194L	GCACTGATCCGGTAATTCAGACT	N/A	N/A	N/A
